# Supplementary material for: Environmental impact of cardiovascular healthcare
Source: HighWire-hosted journal article supplement (doi:10.1136/openhrt-2023-002279), 2023-05-01
Supplement: openhrt-2023-002279supp001_data_supplement.pdf [file openhrt-2023-002279supp001_data_supplement.pdf]

## Literature search strategy

We searched broadly with a range of terms covering our key concepts of environmental impact assessment and cardiovascular (or cardiac or cardiological) healthcare, guided by keywords in the titles and abstracts of papers which we had obtained through our broader work in the area on the environmental impact of healthcare, including one paper specific to cardiac care (our target publication). Our initial search strategies resulted in either too few citations (in the range of 0 to 100 without finding our target publication) or too many (e.g. 10,000-60,000 citations with large volumes of apparently irrelevant articles). Tables S1 and S2 illustrate the broad range of terms we tried in our initial searches. Based on these trial searches, we developed our final search strategy: *environmental.mp AND impact.mp AND cardi\*.mp limited to publication date 2011 onwards and published in English*. Initial searches were done in August-September 2021. The final search strategy was rerun on 31 March 2022 to identify additional citations. Citations were imported to Covidence for title and abstract screening as per PRISMA flow diagram (Supplementary Figure 1).

**Table S1: Search terms tested in Medline (and Embase)**

|                                    |               |                                                                                                                |     |                                                              |
|------------------------------------|---------------|----------------------------------------------------------------------------------------------------------------|-----|--------------------------------------------------------------|
| Concept 1:<br>Environmental impact |               | Concept 2:<br>Healthcare including screening, testing, diagnosis, monitoring, treatment and surgical treatment |     | Concept 3:<br>Cardiovascular disease prevention or treatment |
| Carbon footprint*.mp               | AND           | Healthcare*.mp                                                                                                 | AND | Cardiovascular*.mp                                           |
| OR                                 |               | OR                                                                                                             |     | OR                                                           |
| Emission*.mp                       |               | Prevention*.mp                                                                                                 |     | Coronary*.mp                                                 |
| OR                                 |               | OR                                                                                                             |     | OR                                                           |
| Greenhouse gas*.mp                 |               | Diagnosis*.mp                                                                                                  |     | Cardiac*.mp                                                  |
| OR                                 |               | OR                                                                                                             |     | OR                                                           |
| Gas pollute*.mp                    |               | Screening*.mp                                                                                                  |     | Heart*.mp                                                    |
| OR                                 |               | OR                                                                                                             |     | OR                                                           |
| Carbon Dioxide*.mp                 |               | Treatment*.mp                                                                                                  |     | Circulatory*.mp                                              |
| OR                                 |               | OR                                                                                                             |     | OR                                                           |
| Carbon dioxide emission*.mp        |               | Testing techniques*.mp                                                                                         |     | Heart function*.mp                                           |
| OR                                 |               | OR                                                                                                             |     | OR                                                           |
| Contaminant*.mp                    |               | Medicine*.mp                                                                                                   |     | Circulatory system*.mp                                       |
| OR                                 |               | OR                                                                                                             |     | OR                                                           |
| Contamination*.mp                  |               | Procedures*.mp                                                                                                 |     | Myocardial*.mp                                               |
| OR                                 |               | OR                                                                                                             |     | OR                                                           |
| Smog*.mp                           |               | Mediation*.mp                                                                                                  |     | Heart failure*.mp                                            |
| OR                                 |               | OR                                                                                                             |     |                                                              |
| Fluorocarbon*.mp                   |               | Medical examination*.mp                                                                                        |     |                                                              |
| OR                                 |               | OR                                                                                                             |     |                                                              |
| Poisonous gases*.mp                | Test*.mp      |                                                                                                                |     |                                                              |
| OR                                 | OR            |                                                                                                                |     |                                                              |
| Pollutants*.mp                     | Operation*.mp |                                                                                                                |     |                                                              |
| OR                                 | OR            |                                                                                                                |     |                                                              |

|                                                                                                                                                                    |  |                       |  |  |
|--------------------------------------------------------------------------------------------------------------------------------------------------------------------|--|-----------------------|--|--|
| Climate change*.mp                                                                                                                                                 |  | Health management*.mp |  |  |
| OR                                                                                                                                                                 |  |                       |  |  |
| Global warming*.mp                                                                                                                                                 |  |                       |  |  |
| Including: abstract in English, only humans, time period within 10 years                                                                                           |  |                       |  |  |
| Excluding: review articles, opinion pieces, protocol papers, conference proceedings, animal studies, papers with discussion of environmental impact on individuals |  |                       |  |  |

**Table S2: Search terms tested in Scopus**

|                                                                                                                                                                    |     |                         |     |                        |
|--------------------------------------------------------------------------------------------------------------------------------------------------------------------|-----|-------------------------|-----|------------------------|
| Concept 1                                                                                                                                                          |     | Concept 2               |     | Concept 3              |
| "Carbon footprint" *                                                                                                                                               |     | "Healthcare" *          |     | "Cardiovascular" *     |
| OR                                                                                                                                                                 |     | OR                      |     | OR                     |
| "Emission" *                                                                                                                                                       |     | "Prevention" *          |     | "Coronary" *           |
| OR                                                                                                                                                                 |     | OR                      |     | OR                     |
| "Greenhouse gas"*                                                                                                                                                  |     | "Diagnosis" *           |     | "Cardiac" *            |
| OR                                                                                                                                                                 |     | OR                      |     | OR                     |
| "Gas pollute" *                                                                                                                                                    | AND | "Screening" *           | AND | "Heart" *              |
| OR                                                                                                                                                                 |     | OR                      |     | OR                     |
| "Carbon Dioxide" *                                                                                                                                                 |     | "Treatment" *           |     | "Circulatory" *        |
| OR                                                                                                                                                                 |     | OR                      |     | OR                     |
| "Carbon dioxide emission" *                                                                                                                                        |     | "Testing techniques" *  |     | "Heart function" *     |
| OR                                                                                                                                                                 |     | OR                      |     | OR                     |
| "Contaminant" *                                                                                                                                                    |     | "Medicine" *            |     | "Circulatory system" * |
| OR                                                                                                                                                                 |     | OR                      |     | OR                     |
| "Contamination" *                                                                                                                                                  |     | "Procedures" *          |     | "Myocardial" *         |
| OR                                                                                                                                                                 |     | OR                      |     | OR                     |
| "Smog" *                                                                                                                                                           |     | "Mediation" *           |     | "Heart failure" *      |
| OR                                                                                                                                                                 |     | OR                      |     |                        |
| "Fluorocarbon" *                                                                                                                                                   |     | "Medical examination" * |     |                        |
| OR                                                                                                                                                                 |     | OR                      |     |                        |
| "Poisonous gases" *                                                                                                                                                |     | "Test" *                |     |                        |
| OR                                                                                                                                                                 |     | OR                      |     |                        |
| "Pollutants" *                                                                                                                                                     |     | "Operation" *           |     |                        |
| OR                                                                                                                                                                 |     | OR                      |     |                        |
| "Climate change" *                                                                                                                                                 |     | "Health management" *   |     |                        |
| OR                                                                                                                                                                 |     |                         |     |                        |
| "Global warming" *                                                                                                                                                 |     |                         |     |                        |
| Including: abstract in English, only humans, time period within 10 years                                                                                           |     |                         |     |                        |
| Excluding: review articles, opinion pieces, protocol papers, conference proceedings, animal studies, papers with discussion of environmental impact on individuals |     |                         |     |                        |
