# Supplementary material for: Environmental impact of cardiovascular healthcare
Source: HighWire-hosted journal article supplement (doi:10.1136/openhrt-2023-002279), 2023-05-01
Supplement: openhrt-2023-002279supp002_data_supplement.pdf [file openhrt-2023-002279supp002_data_supplement.pdf]

**Supplementary Figure 1 PRISMA flow diagram showing results of searches, title and abstract screening, full-text review of retrieved reports and final included studies**

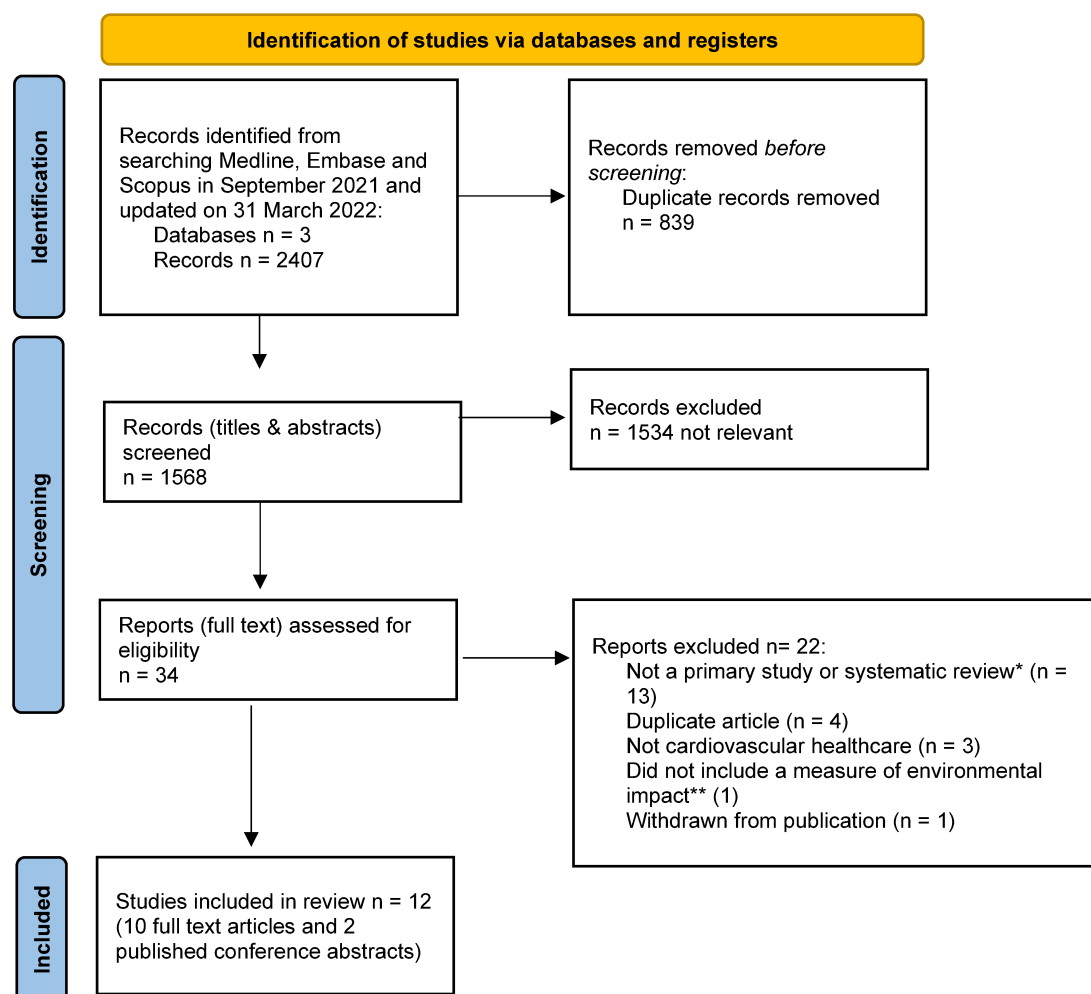

\* For example, perspective pieces, commentaries or opinions, narrative reviews. Four of these were published prior to 2011 and therefore ineligible for at least two reasons.

\*\*For example, measured only health outcomes, or other outcomes such as awareness of radiation risks from diagnostic procedures among physicians.

From: Page MJ, McKenzie JE, Bossuyt PM, Boutron I, Hoffmann TC, Mulrow CD, et al. The PRISMA 2020 statement: an updated guideline for reporting systematic reviews. *BMJ* 2021;372:n71. doi: 10.1136/bmj.n71

For more information, visit: <http://www.prisma-statement.org/>
